# Supplementary material for: Structural Insights into the Interaction of Filovirus Glycoproteins with the Endosomal Receptor Niemann-Pick C1: A Computational Study
Source: MDPI journal article supplement (doi:10.3390/v13050913), 2021-05-14
Supplement: s1 [file s1]

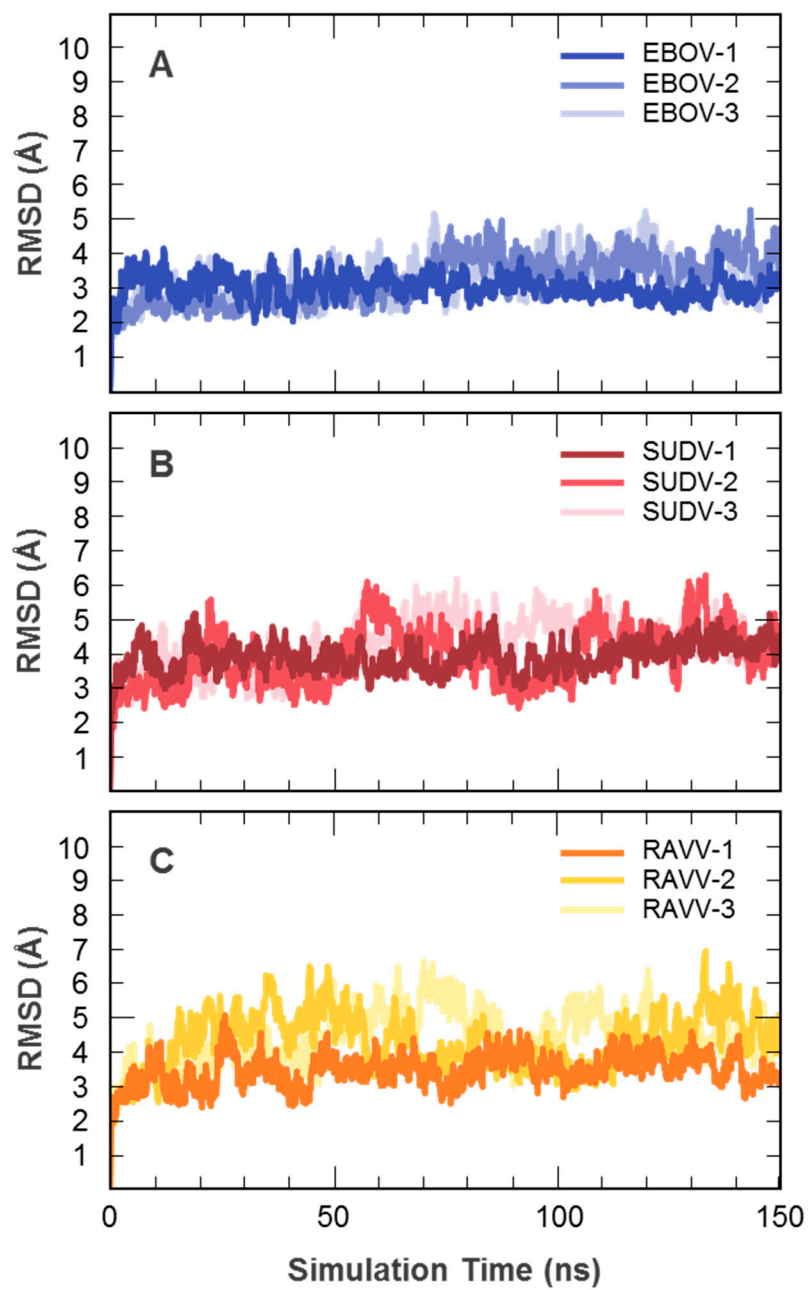

**Figure S1.** Root mean square deviation (RMSD) of the EBOV, SUDV, and RAVV GPcl-NPC1 complexes

**Table S1.** P-values for the multiple comparisons of the distance from the NPC1 loops to each residue of GPcl (EBOV vs SUDV, EBOV vs RAVV, and SUDV vs RAVV)

| residue<br>number | Loop1   |         |         | Loop 2  |         |         |
|-------------------|---------|---------|---------|---------|---------|---------|
|                   | EBOV vs | EBOV vs | SUDV vs | EBOV vs | EBOV vs | SUDV vs |
|                   | SUDV    | RAVV    | RAVV    | SUDV    | RAVV    | RAVV    |
| 79                | 0.034   | 0.298   | 0.523   | 0.038   | 0.107   | 0.157   |
| 80                | 0.557   | 0.721   | 0.842   | 0.022   | 0.068   | 0.158   |
| 81                | 0.600   | 0.799   | 0.582   | 0.148   | 0.796   | 0.414   |
| 82                | 0.517   | 0.223   | 0.189   | 0.251   | 0.220   | 0.081   |
| 83                | 0.736   | 0.078   | 0.079   | 0.301   | 0.296   | 0.126   |
| 84                | 0.543   | 0.097   | 0.072   | 0.329   | 0.007   | 0.018   |
| 85                | 0.440   | 0.061   | 0.065   | 0.422   | 0.000   | 0.004   |
| 86                | 0.499   | 0.023   | 0.008   | 0.266   | 0.000   | 0.010   |
| 87                | 0.960   | 0.012   | 0.009   | 0.269   | 0.000   | 0.004   |
| 88                | 0.740   | 0.002   | 0.010   | 0.292   | 0.000   | 0.008   |
| 111               | 0.202   | 0.375   | 0.409   | 0.077   | 0.017   | 0.011   |
| 112               | 0.282   | 0.455   | 0.172   | 0.856   | 0.020   | 0.021   |
| 113               | 0.448   | 0.352   | 0.618   | 0.721   | 0.019   | 0.020   |
| 114               | 0.116   | 0.011   | 0.861   | 0.276   | 0.010   | 0.004   |
| 115               | 0.380   | 0.009   | 0.782   | 0.359   | 0.009   | 0.000   |
| 116               | 0.385   | 0.028   | 0.994   | 0.871   | 0.001   | 0.004   |
| 141               | 0.369   | 0.188   | 0.249   | 0.009   | 0.062   | 0.005   |
| 142               | 0.221   | 0.022   | 0.460   | 0.147   | 0.049   | 0.014   |
| 143               | 0.238   | 0.002   | 0.878   | 0.230   | 0.018   | 0.052   |
| 144               | 0.336   | 0.009   | 0.637   | 0.133   | 0.015   | 0.030   |
| 145               | 0.325   | 0.012   | 0.403   | 0.128   | 0.004   | 0.000   |
| 146               | 0.388   | 0.152   | 0.838   | 0.589   | 0.000   | 0.000   |
| 147               | 0.247   | 0.015   | 0.162   | 0.498   | 0.002   | 0.002   |
| 148               | 0.048   | 0.002   | 0.001   | 0.003   | 0.085   | 0.009   |
| 152               | 0.305   | 0.003   | 0.017   | 0.171   | 0.006   | 0.035   |
| 170               | 0.154   | 0.004   | 0.060   | 0.223   | 0.055   | 0.048   |

Using Bonferroni correction, P values of less than 0.017 (0.05/3) were considered statistically significant (pink).
